# 1 The utility and caveat of split-GAL4s in the study of neurodegeneration

2

3 Luca Stickley and Emi Nagoshi\*

4 Department of Genetics and Evolution and Institute of Genetics and Genomics of Geneva  
5 (iGE3), University of Geneva, CH-1211, Geneva, Switzerland

6 \*Corresponding author: [Emi.Nagoshi@unige.ch](mailto:Emi.Nagoshi@unige.ch)

7

8 **Keywords:** split-GAL4, neurodegeneration, LRRK2, Parkinson's disease, dopaminergic  
9 neurons

10

## 11 Abstract

12 Parkinson's disease (PD) is the second most common neurodegenerative disorder, afflicting  
13 over 1% of the population of age 60 years and above. The loss of dopaminergic (DA) neurons  
14 in the substantia nigra pars compacta (SNpc) is the primary cause of its characteristic motor  
15 symptoms. Studies using *Drosophila melanogaster* and other model systems have provided  
16 much insight into the pathogenesis of PD. However, little is known why certain cell types are  
17 selectively susceptible to degeneration in PD. Here we describe an approach to identify  
18 vulnerable subpopulations of neurons in the genetic background linked to PD in *Drosophila*,  
19 using the split-GAL4 drivers that enable genetic manipulation of a small number of defined  
20 cell population. We identify a subtype of DA neurons selectively vulnerable in the model of  
21 the *leucine-rich repeat kinase 2 (LRRK2)*-linked familial PD, demonstrating the utility of this  
22 approach. We also show an unexpected caveat of the split-GAL4 system in aging-related  
23 research: the age-dependent increase in the number of GAL4-labeled cells.

24

## 25 Introduction

26 *Drosophila melanogaster* has emerged as a powerful model system to study  
27 neurodegenerative disorders, owing to the conservation of genetic programs and fundamental  
28 neurobiology between flies and humans, as well as its wealth of genetic tools [1]. A prime  
29 example is the research on Parkinson's disease (PD), which is characterized by the loss of  
30 dopaminergic (DA) neurons in the substantia nigra pars compacta (SNpc) and the resulting  
31 locomotor impairments. DA neuron loss is frequently associated with the accumulation of  
32 intracytoplasmic inclusions mainly composed of the aggregates of  $\alpha$ -synuclein protein,

33 termed Lewy bodies (LBs), and those in the neurites, termed Lewy neurites (LNs) [2].  
34 Discoveries of mutations linked to familial PD have led to the generation of numerous PD  
35 models in flies, which have made substantial contributions in understanding pathophysiology  
36 and pathogenic mechanisms of PD [3,4].

37 Understanding pathogenesis of PD requires the identification and characterization of  
38 vulnerable neuronal populations. While PD is increasingly recognized as a multisystem  
39 disorder, its pathology is observed nevertheless in restricted cell types. Postmortem analysis  
40 of PD patients tissues have shown the appearance of LBs and LNs in peripheral nervous  
41 system, including the enteric neurons and the autonomic nervous system, as well as in the  
42 multiple regions of the brainstem [5]. The LB and LN pathology is also observed in  
43 neocortex in the patients of advanced stages [6]. Notably, within the midbrain DA neuron  
44 population, the tegmental area (VTA) and the retrorubral area (RRA) are affected to a much  
45 lesser extent than the SNpc [5], suggesting that cell-type difference has a non-negligible role  
46 in the pathogenesis. It remains unclear whether specific subtypes of SNpc DA neurons are  
47 selectively vulnerable in PD, although the advent of single-cell RNA-sequencing technology  
48 is closing this knowledge gap [7].

49 Here we describe an approach to identify vulnerable subpopulations of DA neurons in  
50 the genetic background linked to PD in *Drosophila*. The method takes advantage of the split-  
51 GAL4 drivers, which enable the expression of transgenes in a small number of defined  
52 subsets of cells [8–10]. We show the utility of this powerful system by identifying a subtype  
53 of DA neurons selectively vulnerable in the model of the *leucine-rich repeat kinase 2*  
54 (*LRRK2*)-linked familial PD. We also show an unexpected and important caveat of this  
55 system for ageing-related research: the age-dependent increase in the number of cells labeled  
56 by the split-GAL4.

57

## 58 **Materials and Methods**

### 59 ***Drosophila culture and strains***

60 Flies were raised on standard cornmeal-agar food at 25°C in a 12h:12h light-dark cycle and  
61 under controlled humidity. Following fly strains were obtained from the Bloomington  
62 *Drosophila* stock center (BDSC): *20XUAS-6XGFP* (B1 #52261), MB316B (B1 #68317),  
63 MB032B (B1 #68302), MB056B (B1 #68276), MB109B (B1 #68261), MB025B (B1 #68299).  
64 *UAS-Lrrk<sup>I1915T</sup>* was described previously [11,12].

65

### 66 ***Immunohistochemistry***

67 Immunostaining was performed as previously described in [11]. Briefly, fly heads were fully  
68 dissected and fixed in 400mL of 4% paraformaldehyde (PFA), 0.3% Triton X-100 for 20 min  
69 on ice. Once fixation was completed, three quick washes followed by three 20-min washes  
70 were performed in PBS, 0.3% Triton X-100. Blocking was achieved with 1 h incubation in  
71 5% normal goat serum (NGS), PBS, 0.3% Triton X-100 at room temperature on a rocking  
72 platform. Brains were incubated with the primary antibodies for two nights at 4°C on a  
73 rocking platform. Brains were then washed and incubated with the secondary antibodies  
74 overnight at 4°C. Vectashield (Vector Laboratories) was used as slide mounting medium.  
75 Antibodies used in this study and dilutions were as follows. Mouse anti-nc82 (mouse,  
76 Developmental Studies Hybridoma Bank, 1:100), Rabbit anti-GFP (G10362, Invitrogen,  
77 1:500), Goat anti-Rabbit IgG Alexa 488 1:200 (A11008, Thermofisher, 1:200), and Goat anti-  
78 mouse IgG-Alexa 633 1:200 (mouse, A21052, Thermofisher, 1:200).

79

### 80 ***Imaging and image analysis***

81 Fly brains were scanned using Leica TCS SP5 confocal microscope, at 40x with 1.4x zoom  
82 Quantification of cell numbers was performed as described (Bou Dib et al. (2014); Tas et al.  
83 (2018)), using the cell counter plugin of Fiji (Fiji is just ImageJ) [13].

84

### 85 ***Statistics and graphics***

86 Statistics were performed in python with the help of several statistical packages. Comparison  
87 between two conditions was performed with the `ttest_ind` function of the python SciPy Stats  
88 package [14]. Two-tailed Student's t-test for equal variance, and Welch's t-test for unequal  
89 variance. Groups with more than one factor were compared with ANOVA with a Tukey's  
90 HSD post-hoc test using the `pairwise_tukeyhsd` function of the python statsmodel package  
91 [15]. Statistical significance for all comparisons was set at  $p < 0.05$ . Graphical representation  
92 of data distributions was performed according to the guidelines of raincloud plots with the  
93 `PtitPrince` python package [16].

94

### 95 **Results**

96 We and others have previously shown the loss of dopaminergic neurons (DA) within the  
97 protocerebral anterior medial (PAM) cluster by genetic or pharmacological insults in adult  
98 *Drosophila* brains [11,17–19]. Although the number of PAM neuron loss observed so far  
99 varies between 15% and 80%, other DA clusters remain unaffected. These results are  
100 reminiscent of regionally restricted dopaminergic neurodegeneration described in early

101 human PD cases, where substantia nigra pars compacta (SNpc) DA neurons are more  
102 susceptible to PD neurodegeneration than ventral tegmental area (VTA) DA neurons [20].  
103 The underlying cause of this distinction between nuclei is unclear but much of the discussion  
104 revolves around morphological as well as electrophysiological differences [20].

105 To investigate potential morphological and electrophysiological differences between  
106 degenerating and non-degenerating DA neurons, we wanted to find and describe a susceptible  
107 PAM subpopulation. PAM neurons comprise approximately 20 subpopulations, projecting to  
108 different subdomains of the mushroom body (MB) [21]. Taking advantage of the split-GAL4  
109 drivers targeting different subpopulations, we sought to identify PAM neuron subtypes that  
110 are vulnerable in PD-linked genetic predispositions. To this end, we focused on a genetic  
111 model of *leucine-rich repeat kinase 2 (LRRK2)*-linked familial PD, based on a targeted  
112 expression of a mutant form of *Drosophila Lrrk (Lrrk<sup>11915T</sup>)* [12]. The split-GAL4 lines  
113 function by using two promoter sequences, one regulating the expression of the DNA binding  
114 domain (DBD.GAL4), while the second the activator domain (AD.GAL4), which then  
115 combine to form a fully functional GAL4 [8]. We selected four lines targeting the PAM-β<sup>2</sup>  
116 subdomain and one line targeting PAM-β<sup>1</sup>, because PAM neurons projecting to the MB  
117 β<sup>1</sup> lobe is required for startle-induced locomotion [22] and their functional impairments  
118 accounts for locomotor deficits in some PD models [23] (Table 1). Evaluation of the  
119 susceptibility was performed by expressing either *UAS-GFP* or *UAS-GFP* in combination  
120 *UAS- Lrrk<sup>11915T</sup>* with each respective driver, followed by dissection at the age day 35 and  
121 counting of GFP-positive neurons. Expression of *Lrrk<sup>11915T</sup>* with MB032B and MB109B  
122 caused no significant reduction in GFP-positive cell counts, while a significant decrease was  
123 observed with MB056B (Fig.1A, D and E). No reduction in the MB025B-expressing cells but  
124 instead a significant increase was observed in the group expressing *Lrrk<sup>11915T</sup>* (Fig. 1A).  
125 These results suggest that MB056B positive but MB032B and MB109B negative cells, i.e.  
126 PAM-β<sup>2</sup>p neurons, are susceptible to LRRK2-induced neuronal loss.

127 To continue investigating vulnerability of PAM subpopulations, it was necessary to  
128 determine if loss of dopaminergic neurons was solely developmental or increased with age.  
129 MB056B-labeled cells observed at day 1 and 2 showed promising results, with clearer  
130 separation between the control and *Lrrk<sup>11915T</sup>* groups in older flies (Fig. B). This trend  
131 continued at timepoints day 14 and day 35, but of grave concern was the ever-increasing  
132 number of GFP positive neurons in both control and *Lrrk<sup>11915T</sup>* groups. Although loss of  
133 neurons in MB316B-labeled population was not significant, the increase of GFP labeled cells

134 was still present (Fig. C). Unfortunately, the issue of increasing GFP<sup>+</sup> cell numbers by age in  
135 split-GAL4 lines is incompatible with the study of age-dependent loss of DA populations.

136

## 137 **Discussion**

### 138 **Split-GAL4 incremental labeling**

139 The number of cells expressing GFP driven by the MB056B and MB316B split-GAL4  
140 drivers increases by age and does not plateau even between days 7 and 35 of age. Whereas  
141 classical GAL4s are expressed monolithically, split-GAL4s require the activator domain  
142 (AD.Gal4) and the DNA-binding domain (DBD.Gal4) to combine and perform its function.  
143 This is achieved by placing a leucine zipper (Zip) on a flexible linker at the N-terminus of  
144 Gal4-DBD.Gal4 (Zip-) and the C-terminus of p65-AD.Gal4 (Zip+) [8,9]. Although age-  
145 dependent increase in the activity of one or both of the promoters expressing the split-GAL4  
146 components could result in the incremental GAL4 reconstitution, it seems unlikely that  
147 activity of involved promoters does not reach a plateau until day 35, if not impossible. As  
148 MB056B and MB316B do not share either AD.Gal4 or DBD.Gal4 promoters, such a  
149 mechanism would be independent of the inserted sequences, for example via changes in  
150 chromatin accessibility by age. Instead, low turnover of reconstituted GAL4 or GAL4-  
151 promoter complex may be a key contributor of the incremental labeling. The binding of  
152 monolithic GAL4 to the promoter has a short half-life *in vivo* [24]. It is worth investigating if  
153 reconstitution of GAL4 by heterodimeric leucine zippers increases GAL4 stability or changes  
154 turnover rate of GAL4-promoter binding. This feature, if indeed the case, would be an  
155 advantage in some application.

156 This study examined only two split-GAL4 lines for age-dependent expression  
157 changes, and it remains to be seen whether the finding is generalized. Yet, our results call for  
158 caution in using the split-GAL4 system. When using split-GAL4s, the comparison between  
159 groups at the same age will be legitimate, whereas comparisons between different age groups  
160 would not produce meaningful results.

161

### 162 **Functional and morphological vulnerability**

163 Although the artifact of split-GAL4 system did not allow continued investigations of this  
164 topic, the finding of possible functional susceptibility is still of note. We found that PAM DA  
165 neurons projecting to a specific region of the MB,  $\beta$ '2p subdomain, were more susceptible  
166 than others. 90% of DA neurons that project to the MB receive feedback of the MB output

167 neurons (MBON) in the convergent zones (crepine, superior medial protocerebrum, superior  
168 intermediate protocerebrum, and superior lateral protocerebrum) [1], which in turn receive  
169 dendrites from the central complex, a region crucial for motor actions [1]. Scaplen et al. [26]  
170 has recently shown that the MBON- $\beta^2$ mp and MBON- $\gamma^5\beta^2a$  have the highest number of  
171 projections to PAM neurons, while MBON- $\beta^1$  had one of the lowest. Although it is unclear  
172 if the PAM neurons synapsed by these MBONs are the same that innervate them, the  
173 differences in the PAM-MB-MBON-PAM feedback loop could explain the increased loss of  
174 neurons in PAM- $\beta^2$  neurons.

175 Work by Zhao et al. [27] has shown that *LRRK2* differs in its interactome depending  
176 on tissue, with a clear shared features found when in the putamen, caudate and nucleus  
177 accumbens. This finding encourages the studies of PAM- $\beta^2$  susceptibility even with the  
178 hindrance of incremental labeling by split-GAL4s. Future work on PAM- $\beta^2$  neurons might  
179 benefit from quantifying key morphological parameters of mitochondria, such as  
180 mitochondrial density, biomass, integrity, motility, and localization.

181

## 182 **Acknowledgements**

183 We thank the Bloomington *Drosophila* Stock Center for fly stocks. We thank Sean Sweeney  
184 for comments on the manuscript.

185

## 186 **Funding**

187 This work was supported by the funding by the Swiss National Science Foundation  
188 (310030\_189169).

189

## 190 **Author contributions**

191 LS and EN conceptualized the work. LS performed experiments and analyzed the data. LS  
192 and EN wrote the manuscript.

193

## 194 **Disclosure statement**

195 The authors report there are no competing interests to declare.

196

## 197 **Data availability statement**

198 All the data are presented in the paper. The original image data are available upon request.

199

## 200 **References**



- 201 1. Lu B, Vogel H. *Drosophila* Models of Neurodegenerative Diseases. *Annu Rev Pathol*  
202 *Mech Dis.* 2009;4: 315–342. doi:10.1146/annurev.pathol.3.121806.151529
- 203 2. Shulman JM, De Jager PL, Feany MB. Parkinson’s disease: genetics and pathogenesis.  
204 *Annu Rev Pathol.* 2010/11/03 ed. 2011;6: 193–222. doi:10.1146/annurev-pathol-  
205 011110-130242
- 206 3. Xiong Y, Yu J. Modeling Parkinson’s Disease in *Drosophila*: What Have We Learned  
207 for Dominant Traits? *Front Neurol.* 2018;9: 228. doi:10.3389/fneur.2018.00228
- 208 4. Aryal B, Lee Y. Disease model organism for Parkinson disease: *Drosophila*  
209 *melanogaster*. *BMB Rep.* 2019;52: 250–258. doi:10.5483/BMBRep.2019.52.4.204
- 210 5. Sulzer D, Surmeier DJ. Neuronal vulnerability, pathogenesis, and Parkinson’s disease.  
211 *Movement Disorders.* 2013;28: 41–50. doi:10.1002/mds.25095
- 212 6. Martin WRW, Younce JR, Campbell MC, Racette BA, Norris SA, Ushe M, et al.  
213 Neocortical Lewy body pathology parallels Parkinson’s dementia, but not always.  
214 *Annals of Neurology.* n/a. doi:10.1002/ana.26542
- 215 7. Kamath T, Abdulraouf A, Burris SJ, Langlieb J, Gazestani V, Nadaf NM, et al. Single-  
216 cell genomic profiling of human dopamine neurons identifies a population that  
217 selectively degenerates in Parkinson’s disease. *Nat Neurosci.* 2022;25: 588–595.  
218 doi:10.1038/s41593-022-01061-1
- 219 8. Luan H, Peabody NC, Vinson CR, White BH. Refined Spatial Manipulation of  
220 Neuronal Function by Combinatorial Restriction of Transgene Expression. *Neuron.*  
221 2006;52: 425–436. doi:10.1016/j.neuron.2006.08.028
- 222 9. Luan H, Diao F, Scott RL, White BH. The *Drosophila* Split Gal4 System for Neural  
223 Circuit Mapping. *Frontiers in Neural Circuits.* 2020;14. Available:  
224 <https://www.frontiersin.org/articles/10.3389/fncir.2020.603397>
- 225 10. Dionne H, Hibbard KL, Cavallaro A, Kao J-C, Rubin GM. Genetic Reagents for  
226 Making Split-GAL4 Lines in *Drosophila*. *Genetics.* 2018;209: 31–35.  
227 doi:10.1534/genetics.118.300682
- 228 11. Miozzo F, Valencia-Alarcón EP, Stickley L, Majcin Dorcikova M, Petrelli F, Tas D, et  
229 al. Maintenance of mitochondrial integrity in midbrain dopaminergic neurons governed  
230 by a conserved developmental transcription factor. *Nat Commun.* 2022;13: 1426.  
231 doi:10.1038/s41467-022-29075-0
- 232 12. Kanao T, Venderova K, Park DS, Unterman T, Lu B, Imai Y. Activation of FoxO by  
233 LRRK2 induces expression of proapoptotic proteins and alters survival of postmitotic  
234 dopaminergic neuron in *Drosophila*. *Hum Mol Genet.* 2010/07/14 ed. 2010;19: 3747–  
235 58. doi:10.1093/hmg/ddq289
- 236 13. Schindelin J, Arganda-Carreras I, Frise E, Kaynig V, Longair M, Pietzsch T, et al. Fiji:  
237 an open-source platform for biological-image analysis. *Nat Methods.* 2012;9: 676–82.  
238 doi:10.1038/nmeth.2019

- 239 14. Virtanen P, Gommers R, Oliphant TE, Haberland M, Reddy T, Cournapeau D, et al.  
240 SciPy 1.0: Fundamental Algorithms for Scientific Computing in Python. *Nature*  
241 *Methods*. 2020;17: 261–272. doi:10.1038/s41592-019-0686-2
- 242 15. Seabold S, Perktold J. statsmodels: Econometric and statistical modeling with python.  
243 9th Python in Science Conference. 2010.
- 244 16. Allen M, Poggiali D, Whitaker K, Marshall TR, Kievit RA. Raincloud plots: a multi-  
245 platform tool for robust data visualization. *Wellcome open research*. 2019;4.
- 246 17. Bou Dib P, Gnagi B, Daly F, Sabado V, Tas D, Glauser DA, et al. A conserved role for  
247 p48 homologs in protecting dopaminergic neurons from oxidative stress. *PLoS Genet*.  
248 2014;10: e1004718. doi:10.1371/journal.pgen.1004718
- 249 18. Tas D, Stickley L, Miozzo F, Koch R, Loncle N, Sabado V, et al. Parallel roles of  
250 transcription factors dFOXO and FER2 in the development and maintenance of  
251 dopaminergic neurons. *PLoS Genet*. 2018;14: e1007271.  
252 doi:10.1371/journal.pgen.1007271
- 253 19. Pütz SM, Kram J, Rauh E, Kaiser S, Toews R, Lueningschroer-Wang Y, et al. Loss of  
254 p21-activated kinase Mbt/PAK4 causes Parkinson-like phenotypes in *Drosophila*.  
255 *Disease Models & Mechanisms*. 2021;14. doi:10.1242/dmm.047811
- 256 20. Surmeier DJ, Obeso JA, Halliday GM. Selective neuronal vulnerability in Parkinson  
257 disease. *Nat Rev Neurosci*. 2017;18: 101–113. doi:10.1038/nrn.2016.178
- 258 21. Aso Y, Hattori D, Yu Y, Johnston RM, Iyer NA, Ngo T-T, et al. The neuronal  
259 architecture of the mushroom body provides a logic for associative learning. Griffith  
260 LC, editor. *eLife*. 2014;3: e04577. doi:10.7554/eLife.04577
- 261 22. Sun J, Xu AQ, Giraud J, Poppinga H, Riemensperger T, Fiala A, et al. Neural Control of  
262 Startle-Induced Locomotion by the Mushroom Bodies and Associated Neurons in  
263 *Drosophila*. *Front Syst Neurosci*. 2018;12: 6. doi:10.3389/fnsys.2018.00006
- 264 23. Riemensperger T, Issa AR, Pech U, Coulom H, Nguyen MV, Cassar M, et al. A single  
265 dopamine pathway underlies progressive locomotor deficits in a *Drosophila* model of  
266 Parkinson disease. *Cell Rep*. 2013/11/19 ed. 2013;5: 952–60.  
267 doi:10.1016/j.celrep.2013.10.032
- 268 24. Collins GA, Lipford JR, Deshaies RJ, Tansey WP. Gal4 turnover and transcription  
269 activation. *Nature*. 2009;461: E7–E7. doi:10.1038/nature08406
- 270 25. Strauss R. The central complex and the genetic dissection of locomotor behaviour.  
271 *Current opinion in neurobiology*. 2002;12: 633–638.
- 272 26. Scaplen KM, Talay M, Fisher JD, Cohn R, Sorkaç A, Aso Y, et al. Transsynaptic  
273 mapping of *Drosophila* mushroom body output neurons. *Elife*. 2021;10: e63379.
- 274 27. Zhao Y, Vavouraki N, Lovering RC, Escott-Price V, Harvey K, Lewis PA, et al. Tissue  
275 specific LRRK2 interactomes reveal a distinct functional unit within the striatum.  
276 *bioRxiv*. 2022.



277 **Table 1. List of Split-GAL4 lines used and the PAM neuron subtypes targeted.**  
278 (AD.Gal4) Activator domain inserted at site attP40 (2L) landing site, while DNA Binding  
279 Domain (DBD.Gal4) uses the attP2 (3L) landing site. Expression, PAM neuron subtypes  
280 targeted by each line, as described in [21].

281

| Name   | AD.Gal4 (attP40) | DBD.Gal4 (attP2) | Expression                                                                                  |
|--------|------------------|------------------|---------------------------------------------------------------------------------------------|
| MB316B | R58E02           | R93G08           | PAM- $\beta$ '2m, PAM- $\beta$ '2p, PAM- $\gamma$ 4, PAM- $\gamma$ 4< $\gamma$ 1 $\gamma$ 2 |
| MB032B | R30G08           | ple              | PAM- $\beta$ '2m                                                                            |
| MB056B | R76F05           | R80G12           | PAM- $\beta$ '2m, PAM- $\beta$ '2p                                                          |
| MB109B | R76F05           | R23C12           | PAM- $\beta$ '2a                                                                            |
| MB025B | R24E12           | R52H01           | PAM- $\beta$ '1ap, PAM- $\beta$ '1m                                                         |

282

283

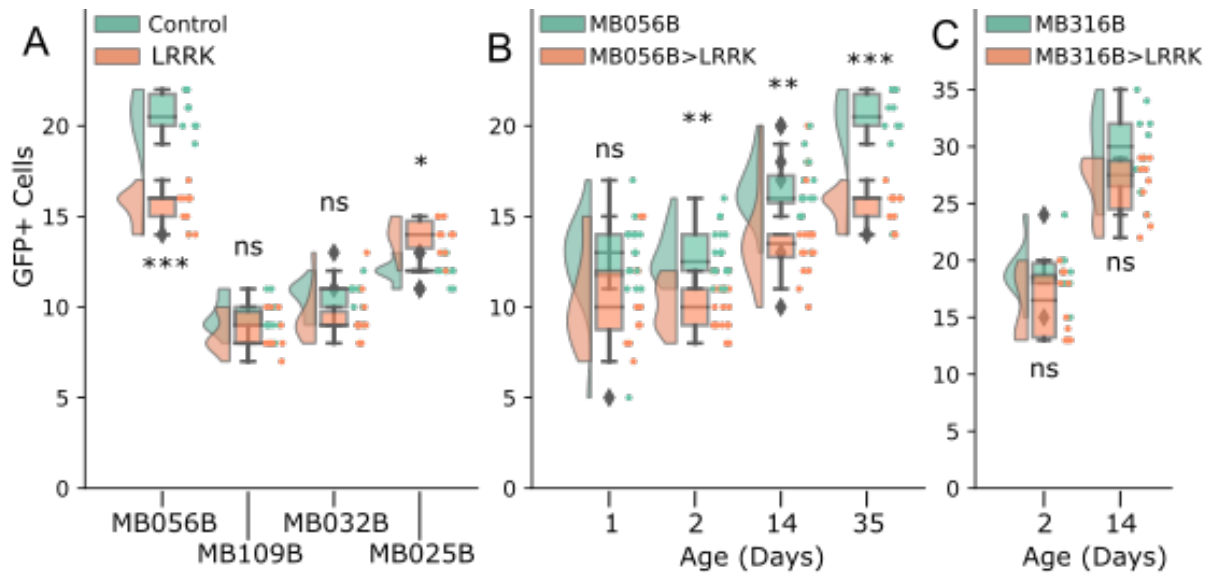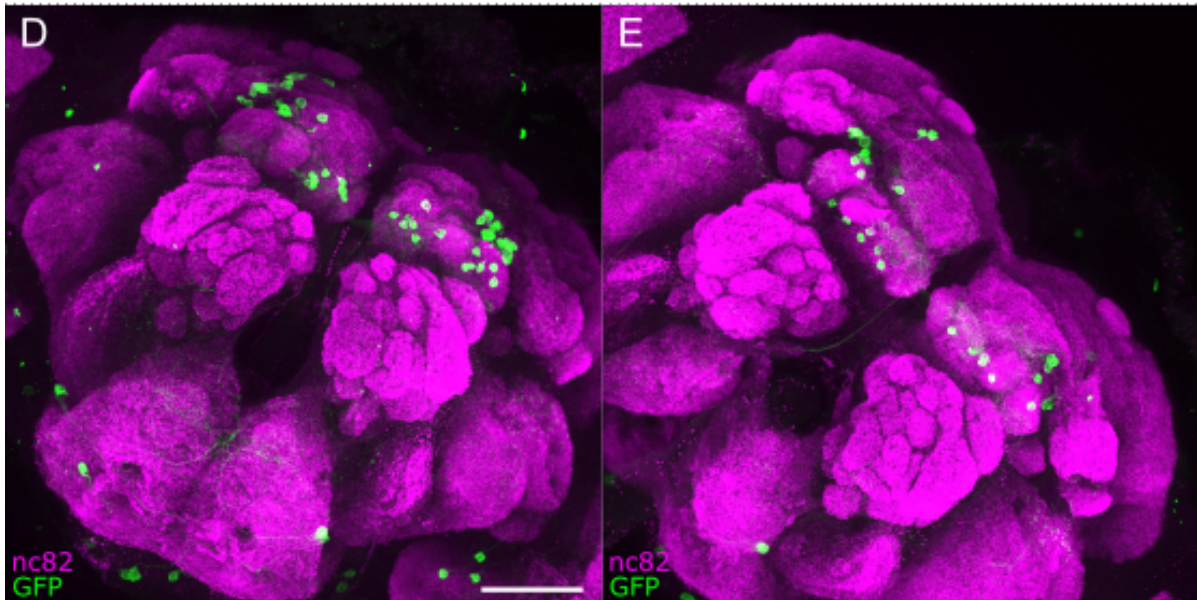

284

285

286 **Figure 1. PAM-β'2 neurons show increased susceptibility to degeneration by *Lrrk*<sup>11915T</sup>**

287 **expression.** (A). The number of GFP-positive cells in the flies expressing *GFP* with (LRRK)

288 or without (Control) *Lrrk*<sup>11915T</sup> driven by the indicated split-GAL4 drivers. Day 35. Tukey

289 HSD, MB056B p=0.001 (\*\*\*) (n=10); MB109B p=0.6941 (n=10); MB032B p=0.5872

290 (n=10); MB025B p=0.0319 (\*) (n=10). (B) The number of GFP-positive cells in MB056B

291 control or MB056B> *Lrrk*<sup>11915T</sup> at days 1, 2, 14, and 35. The graph shows progressive

292 increase in the both the number of neurons and disparity between treated and untreated

293 groups. Statistics comparing treated and untreated for each time-point. Tukey HSD; Day 1

294 p=0.0864 (n=12-16), Day 2 p=0.0011 (\*\*) (n=20), Day 14 p=0.0078 (\*\*) (n=16), Day 35

295 p=0.001 (\*\*\*) (n=10). (C) Number of GFP+ cell in MB316B control or

296 MB056B>*Lrrk*<sup>11915T</sup> at day 2 and 14. An increment in number of labelled neurons is also

297 present in this split-GAL4. No comparison between control and *Lrrk*<sup>11915T</sup> groups is

298 significant. Tukey HSD; Day 2 p=0.181 (n=10), Day 14 p=0.0843 (n=10). (D and E)

299 MB056B (D) and MB056B>*Lrrk*<sup>11915T</sup> (E) at day 35. max projections showing neuropil

300 staining by anti-NC82 and MB056B-labeled cells with anti-GFP. Scale bars = 50 μm.
